# Supplementary material for: Establishment of Surgical Difficulty Grading System and Application of MRI-Based Artificial Intelligence to Stratify Difficulty in Laparoscopic Rectal Surgery
Source: MDPI journal article supplement (doi:10.3390/bioengineering10040468), 2023-04-12
Supplement: s1 [file s1]

This is the demonstration video of each difficulty grade.

Grade I: Easy procedure, without difficulty.

Grade II: Difficult procedure, but no impact on specimen quality (complete TME).

Grade III: Difficult procedure, with slight impact on specimen quality (near-complete TME).

Grade IV: Very difficult procedure, with severe impact on specimen quality (incomplete TME).
